# Supplementary material for: FMN-dependent oligomerization of putative lactate oxidase from Pediococcus acidilactici
Source: PubMed Central journal article supplement (PMC7039449; doi:10.1371/journal.pone.0223870), 2020-02-24
Supplement: pone.0223870.s010.pdf [file pone.0223870.s010.pdf]

**S1 Table. SAXS summary.**

| <b>Parameters / Data</b>                                                   |                                                         |                                                         |                                                         |
|----------------------------------------------------------------------------|---------------------------------------------------------|---------------------------------------------------------|---------------------------------------------------------|
| <b>sample details</b>                                                      | <b>PaLCTO native WT</b>                                 | <b>PaLCTO monomer</b>                                   | <b>PaLCTO refolded WT</b>                               |
| Organism                                                                   | <i>Pediococcus acidilactici</i>                         | <i>Pediococcus acidilactici</i>                         | <i>Pediococcus acidilactici</i>                         |
| Uniprot sequence IDs                                                       | EONE46                                                  | EONE46                                                  | EONE46                                                  |
| Extinction coefficient (A280, 0.1% (w/v))                                  | 0.653                                                   | 0.653                                                   | 0.653                                                   |
| M from chemical composition (Da)                                           | 39678                                                   | 39678                                                   | 39678                                                   |
| SEC-SAXS column                                                            | Superose 6 increase 3.2/300                             | Superose 6 increase 3.2/300                             | Superose 6 increase 3.2/300                             |
| injected volume ( $\mu$ l)                                                 | 60                                                      | 60                                                      | 60                                                      |
| Flowrate (ml/min)                                                          | 0.075                                                   | 0.060                                                   | 0.075                                                   |
| Solvent (buffer)                                                           | 30mM Hepes pH 7.5, 350 mM NaCl, 5% glycerol, 0.5mM TCEP | 30mM Hepes pH 7.5, 350 mM NaCl, 5% glycerol, 0.5mM TCEP | 30mM Hepes pH 7.5, 350 mM NaCl, 5% glycerol, 0.5mM TCEP |
| <b>SAXS data collection parameters</b>                                     |                                                         |                                                         |                                                         |
| Beamline/Instrument /data processing                                       | B21, DLS, UK                                            | B21, DLS, UK                                            | B21, DLS, UK                                            |
| Beam size                                                                  | 250 x 250 $\mu$ m                                       | 250 x 250 $\mu$ m                                       | 250 x 250 $\mu$ m                                       |
| Detector                                                                   | Eiger 4M                                                | Eiger 4M                                                | Eiger 4M                                                |
| Wavelength ( $\text{\AA}$ )                                                | 1                                                       | 1                                                       | 1                                                       |
| camera length (m)                                                          | 4.014                                                   | 4.014                                                   | 4.014                                                   |
| q measurement range (per $\text{\AA}$ )                                    | 0.0032 to 0.38                                          | 0.0032 to 0.38                                          | 0.0032 to 0.38                                          |
| Exposure time (sec)                                                        | 3                                                       | 3                                                       | 3                                                       |
| sample configuration                                                       | SEC-SAXS with quartz cell capillary                     | SEC-SAXS with quartz cell capillary                     | SEC-SAXS with quartz cell capillary                     |
| sample temperature ( $^{\circ}$ C)                                         | 20                                                      | 20                                                      | 20                                                      |
| <b>software employed for SAXS data reduction, analysis, interpretation</b> |                                                         |                                                         |                                                         |
| SAXS data reduction                                                        | I(q) Vs q, solvent subtraction using Scatter            | I(q) Vs q, solvent subtraction using Scatter            | I(q) Vs q, solvent subtraction using Scatter            |
| Extinction coefficient estimate                                            | Protparam                                               | Protparam                                               | Protparam                                               |
| Basic analysis : Guiner, $\rho(r)$ , $V_p$                                 | PRIMUS from ATSAS, Scatter                              | PRIMUS from ATSAS, Scatter                              | PRIMUS from ATSAS, Scatter                              |
| Atomic structure modelling                                                 | CRY SOL                                                 | CRY SOL                                                 | CRY SOL                                                 |
| <b>structural parameters</b>                                               |                                                         |                                                         |                                                         |

|                                                         |                     |                         |                         |
|---------------------------------------------------------|---------------------|-------------------------|-------------------------|
| <b>guinier analysis</b>                                 |                     |                         |                         |
| I(0) cm <sup>-1</sup>                                   | 0.1262              | 0.5779E-01              | 0.1113E+0               |
| q range (Å <sup>-1</sup> )                              | 0.0070 – 0.2174     | 0.0090 – 0.3450         | 0.0068 - 0.2170         |
| R <sub>g</sub>                                          | 36.7                | 23.2                    | 36.8                    |
| qR <sub>g</sub> max                                     | 1.27                | 1.26                    | 1.28                    |
| <b>P(r) analysis</b>                                    |                     |                         |                         |
| I(0) cm <sup>-1</sup>                                   | 0.1262 ± 0.4779E-04 | 0.5779E-01 ± 0.4591E-04 | 0.1113E+00 ± 0.5212E-04 |
| R <sub>g</sub> (Å)                                      | 0.3662 ± 0.1771E-01 | 0.2350E=02 ± 0.3780E-01 | 0.3673E+02 ± 0.1954E-01 |
| dmax (Å)                                                | 113                 | 85.3                    | 113.14                  |
| q range (Å <sup>-1</sup> )                              | 0.0070 - 0.2174     | 0.0090 – 0.3450         | 0.0068 – 0.2170         |
| χ <sup>2</sup> (total estimate from GNOM)               | 0.9505              | 0.71                    | 0.9834                  |
| Porod volume, Po (Å <sup>-3</sup> )                     | 271747              | 61973                   | 271754                  |
| Molecular weight derived from -SAXS MoW2.0              | 153                 | 40                      | 151                     |
| <b>CRYSOL</b>                                           |                     |                         |                         |
| χ <sup>2</sup> (goodness of fit) with the atomic model  | 1.6                 | NA                      | 1.6                     |
| predicted R <sub>g</sub> (Å)                            | 36.5                | NA                      | 36.62                   |
| vol (Å <sup>3</sup> ), Ra (Å), Dro e (Å <sup>-3</sup> ) | 186186              | NA                      | 197197                  |
